# Supplementary material for: Patient and doctor attitudes and beliefs concerning perioperative do not resuscitate orders: anesthesiologists’ growing compliance with patient autonomy and self determination guidelines
Source: PubMed Central journal article supplement (PMC3548687; doi:10.1186/1471-2253-13-2), 2013-01-15
Supplement: 1471-2253-13-2-S1.pdf [file 1471-2253-13-2-S1.pdf]

|                                                                                                                                                                                                                                                        |                          |                          |                          |                          |                          |                          |
|--------------------------------------------------------------------------------------------------------------------------------------------------------------------------------------------------------------------------------------------------------|--------------------------|--------------------------|--------------------------|--------------------------|--------------------------|--------------------------|
| <p>(6) The decision as to whether to resuscitate a patient during surgery should be left up to the surgeon and anesthesiologist alone because patients can not fully understand the complex processes that take place during a surgical procedure.</p> | <input type="checkbox"/> | <input type="checkbox"/> | <input type="checkbox"/> | <input type="checkbox"/> | <input type="checkbox"/> | <input type="checkbox"/> |
| <p>(7) The type of surgical procedure a patient undergoes should influence whether a patient's request not to be resuscitated is followed.</p>                                                                                                         | <input type="checkbox"/> | <input type="checkbox"/> | <input type="checkbox"/> | <input type="checkbox"/> | <input type="checkbox"/> | <input type="checkbox"/> |

(8) What is your age (yr)?

- 21-35
- 36-50
- 51-65
- 66-70
- >70
- Prefer not to answer

**THANK YOU**

This sheet will be collected with your other materials by the Clinic staff.
